# Supplementary material
Source: PubMed Central journal article supplement (PMC5710618)
Supplement: jamacardiol-2-742-s001.pdf [file jamacardiol-2-742-s001.pdf]

## Supplementary Online Content

Beohar N, Doshi D, Thourani VH, et al. Association of transcatheter aortic valve replacement with 30-day renal function and 1-year outcomes among patients presenting with compromised baseline renal function: experience from the PARTNER 1 trial and registry. *JAMA Cardiol*. Published online May 3, 2017.  
doi:10.1001/jamacardio.2017.1220

**eFigure.** Study Flow

**eTable 1.** Baseline Characteristics of Patients With vs. Without Paired eGFR Measurements at Baseline and 30 Days

**eTable 2.** Baseline Echocardiographic and Hemodynamic Characteristics of Patients With vs. Without Paired eGFR

**eTable 3.** Procedural Characteristics of Patients With vs. Without Paired eGFR

This supplementary material has been provided by the authors to give readers additional information about their work.

eFigure 1. Study Flow

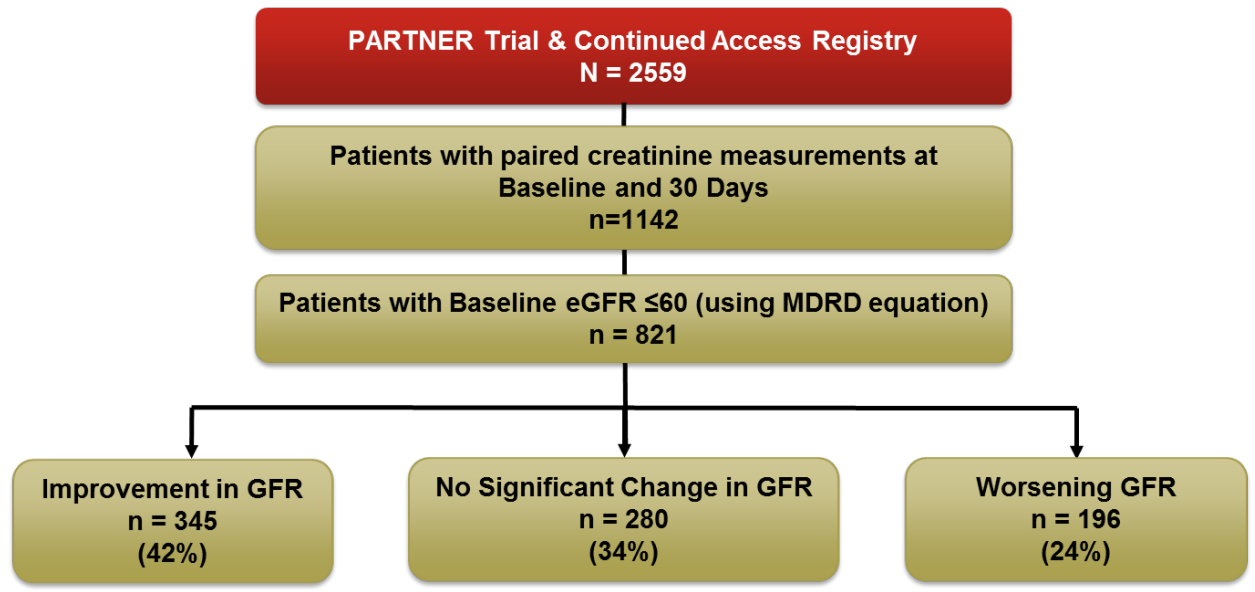

eTable 1. Baseline Characteristics of patients with vs. without paired eGFR measurements

| <b>Baseline Characteristics</b> | <b>With paired eGFR<br/>n=821</b> | <b>Without paired<br/>eGFR<br/>n=1738</b> | <b>P value</b> |
|---------------------------------|-----------------------------------|-------------------------------------------|----------------|
| Age (yrs.)                      | 84.82 ± 6.87                      | 84.29 ± 7.28                              | 0.07           |
| Female                          | 48.7%                             | 47.2%                                     | 0.47           |
| BMI                             | 27.01 ± 6.15                      | 26.62 ± 6.35                              | 0.15           |
| Diabetes                        | 36.8%                             | 36.6%                                     | 0.94           |
| COPD                            | 43.4%                             | 45.2%                                     | 0.39           |
| Renal disease<br>(Cr ≥ 2 mg/dl) | 20.3%                             | 14.6%                                     | 0.0003         |
| CAD                             | 79.6%                             | 76.9%                                     | 0.12           |
| PAD                             | 42.2%                             | 43.1%                                     | 0.68           |
| Smoker                          | 46.0%                             | 49.5%                                     | 0.10           |
| HTN                             | 93.2%                             | 91.1%                                     | 0.08           |
| PHTN                            | 40.0%                             | 38.5%                                     | 0.48           |
| NYHA 3/4                        | 94.3%                             | 95.1%                                     | 0.41           |
| Liver Disease                   | 2.1%                              | 2.9%                                      | 0.21           |
| Median STS [IQR]                | 10.80 [9.40, 13.20]               | 10.70 [9.20, 12.70]                       | 0.03           |
| Baseline eGFR                   | 40.9 ± 11.1                       | 57.8 ± 22.6                               | <0.0001        |

Continuous data are mean ± SD or median [IQR]. Categorical data are %

CAD: Coronary artery disease, COPD: Chronic obstructive pulmonary disease, GFR: glomerular filtration rate (determined by MDRD formula), IQR: Interquartile Range, NYHA: New York Heart Association Class, PAD: peripheral artery disease, PHTN: pulmonary hypertension; STS: Society of Thoracic Surgeons Predicted Risk of Mortality Score

eTable 2: Baseline Echocardiographic and Hemodynamic Characteristics of Patients

With vs. Without Paired eGFR

| <b>Hemodynamic Characteristic</b>          | <b>With paired eGFR<br/>n=821</b> | <b>Without paired<br/>eGFR<br/>n=1738</b> | <b><i>P</i> value</b> |
|--------------------------------------------|-----------------------------------|-------------------------------------------|-----------------------|
| Mean Aortic valve Gradient (mmHg)          | 39.47 ± 15.29                     | 40.08 ± 17.35                             | 0.43                  |
| Mean Cardiac Index (L/min/m <sup>2</sup> ) | 2.09 ± 0.99                       | 2.18 ± 2.27                               | 0.22                  |
| Stroke Volume (mL)                         | 65.42 ± 20.40                     | 65.81 ± 20.94                             | 0.77                  |
| Mean Baseline LVEF (%)                     | 51.74 ± 12.97                     | 52.71 ± 12.97                             | 0.08                  |
| Baseline LV mass (g)                       | 250.83 ± 75.50                    | 248.99 ± 76.77                            | 0.59                  |

Data are mean±SD.

eTable 3: Procedural Characteristics of Those with vs. Without Paired eGFR

| <b>Procedural Characteristic</b> | <b>With paired eGFR<br/>n=821</b> | <b>Without paired eGFR<br/>n=1738</b> | <b><i>P</i> value</b> |
|----------------------------------|-----------------------------------|---------------------------------------|-----------------------|
| Successful valve implantation    | 97.8%                             | 97.3%                                 | 0.44                  |
| Conversion to open heart surgery | 1.2%                              | 1.5%                                  | 0.58                  |
| Volume of contrast used (cc)     | 118.26 ± 130.53                   | 126.50 ± 116.07                       | 0.13                  |
